# Supplementary material
Source: HighWire-hosted journal article supplement (https://n.neurology.org/content/suppl/2007/04/24/67.9.1542)
Supplement: NEUROLOGY2016000006.pdf [file NEUROLOGY2016000006.pdf]

# Parámetro de práctica: evaluación diagnóstica del niño en estado epiléptico (revisión basada en la evidencia)

Reporte del subcomité de normas de calidad de la Academia América de Neurología y el comité de práctica de la Sociedad de Neurología Pediátrica

J.J. Riviello, Jr., MD  
S. Ashwal, MD  
D. Hirtz, MD  
T. Glauser, MD  
K. Ballaban-Gil, MD  
K. Kelley, MD  
L.D. Morton, MD  
S. Phillips, MD  
E. Sloan, MD  
S. Shinnar, MD, PhD

## RESUMEN

**Objetivo:** Revisar la evidencia correspondiente a la evaluación del niño en estado epiléptico (EE). **Métodos.** Se revisó, resumió y clasificó la literatura relevante. Se calculó un mínimo de rendimiento diagnóstico cuando faltaban datos. Las recomendaciones se basaron en un sistema de cuatro niveles de clasificación de las pruebas. **Resultados.** Los estudios de laboratorio ( $\text{Na}^{++}$  u otros electrolitos,  $\text{Ca}^{++}$ , glucosa) fueron anormales en casi 6% y por lo general son ordenados como práctica rutinaria. Cuando se llevaron a cabo en niños cultivos de sangre o líquido cefalorraquídeo, los cultivos de sangre fueron anormales en 2.5% y se encontró infección del sistema nervioso central (SNC) en 12.8%. Cuando se ordenó una prueba de los niveles de fármacos antiepilépticos (FAE) en niños con epilepsia que ya tomaban fármacos antiepilépticos (FAE), éstos fueron bajos en 32% de ellos. Un total de 3.6% de los niños tenía evidencia de ingesta. Cuando se realizaron estudios sobre errores innatos del metabolismo (EIM), se encontró una anomalía en 4.2%. Las anomalías epileptiformes ocurrieron en 43% de los electroencefalogramas (EEG) de niños en EE y ayudó a determinar la naturaleza y localización de un evento precipitante electroconvulsivo (8% generalizado, 16% focal y 19% ambos). En 8% de los niños se encontraron anomalías en los estudios de neuroimagen que podrían explicar la etiología del EE. **Recomendaciones.** Aunque la práctica clínica común es que los hemocultivos y la punción lumbar se obtengan si existe sospecha clínica de una infección sistémica o del SNC, no existen suficientes datos que apoyen o rechacen las recomendaciones en cuanto a si los hemocultivos o punción lumbar deben realizarse de manera rutinaria en quienes no existe sospecha clínica de infección sistémica o del SNC (nivel U). Las pruebas de los niveles de FAE deberán considerarse cuando un niño con epilepsia tratada desarrolla EE (nivel B). Cuando existen indicadores clínicos sugestivos o cuando la evaluación inicial no revela etiología alguna, análisis toxicológicos y metabólicos deberán ser considerados para EIM en niños en EE (nivel C). También deberá tenerse en cuenta un EEG en un niño en EE, cuando existe sospecha de pseudoestado epiléptico (EE no epiléptico), o EE no convulsivo, ya que sería útil para determinar si existen anomalías focales o generalizadas que orienten estudios adicionales para la etiología de EE y el tratamiento (nivel C). Después de que el niño sea estabilizado, se debe considerar la neuroimagenología si existen indicadores clínicos o si se desconoce la etiología (nivel C). No hay pruebas suficientes para apoyar o refutar la neuroimagenología de rutina en un niño que presenta EE (nivel U). **Neurology® 2006;67:1542-1550**

El estado epiléptico (EE) tanto en niños como en adultos es una urgencia potencialmente mortal, que requiere de su pronto reconocimiento y tratamiento inmediato. Aunque desde 1983 se han utilizado varias definiciones de EE, la más aceptada es una crisis con duración de 30 minutos basada en estudios previos en los que hubo evidencia de lesión

From the Division of Epilepsy and Clinical Neurophysiology and the Critical Care Neurology Service (J.J.R.), Department of Neurology, Children's Hospital, Boston, and Harvard Medical School, MA; Division of Child Neurology (S.A.), Department of Pediatrics, Loma Linda University School of Medicine, CA, CNS representative to the Quality Standards Committee; National Institute of Neurological Disorders and Stroke (D.H.), NIH, Bethesda, MD, CNS representative to the Quality Standards Committee; Comprehensive Epilepsy Center (T.G.), Children's Medical Center, Cincinnati, OH, representative of the Epilepsy Foundation of America; Albert Einstein College of Medicine (K.B.-G.), Bronx, NY, representative of the American Epilepsy Society; Children's Memorial Hospital and Northwestern Medical School (K.K.), Chicago, IL, representative of the American Epilepsy Society; Division of Child Neurology (L.D.M.), Virginia Commonwealth University, Richmond, representative of the Child Neurology Society; Children's Hospital of Orange County (S.P.), CA, representative of the American Academy of Pediatrics; Department of Emergency Medicine (E.S.), University of Illinois at Chicago School of Medicine, representative of the American College of Emergency Physicians; Departments of Neurology and Pediatrics (S.S.), Comprehensive Epilepsy Management Center, Montefiore Medical Center, Albert Einstein College of Medicine, Bronx, NY.

Endorsed by the American College of Emergency Physicians on August 31, 2006; by the American Academy of Pediatrics on October 3, 2006; and by the American Epilepsy Society on October 3, 2006.

Approved by the Quality Standards Subcommittee on January 28, 2006; by the Practice Committee on August 5, 2006; and by the AAN Board of Directors on August 17, 2006.

Address correspondence and reprint requests to American Academy of Neurology, 1080 Montreal Avenue, St. Paul, MN 55116; e-mail: [guidelines@aan.com](mailto:guidelines@aan.com)

The American Academy of Neurology Institute and its publisher thank the Mexican Academy of Neurology for translating this guideline.

cerebral en monos adultos después de 45–60 minutos de crisis continua.<sup>1–3</sup> Esta definición de los 30 minutos se adoptó en estudios subsecuentes del EE y por el grupo de trabajo sobre el EE de la Fundación de América para la Epilepsia.<sup>4,5</sup> Esta definición también incluye dos o más crisis secuenciales sin recuperación total de la conciencia entre crisis.<sup>5</sup>

El EE se clasifica por el tipo de crisis y etiología.<sup>6,7</sup> El tipo de convulsión está determinada por el origen de la descarga epiléptica (focal o generalizada) o si la información disponible es insuficiente, indeterminada o inclasificable.<sup>8–10</sup> Como se define en la tabla 1, la clasificación etiológica del EE incluye: 1. sintomática aguda; 2. sintomática remota; 3. sintomática remota con precipitante agudo; 4. encefalopatía progresiva; 5. febril, y 6. criptogénica.<sup>4,5,11,12</sup> Cuando algunos de estos estudios se hicieron, el término idiopático se empleaba para episodios ahora llamados criptogénicos. Esta categoría se reserva para epilepsias genéticamente determinadas.<sup>13</sup> El término sintomática remota con un precipitante agudo se refiere al niño en EE con diagnóstico previo de epilepsia.

En Estados Unidos la incidencia de EE en niños varía de 10 a 58 por cada 100,000 al año para niños de 1 a 19 años de edad (media 38.8 y mediana 43.8 por cada 100,000 al año, IC95% 18.2–59.5 por cada 100,000 al año) o de 31,600 niños menores de 18 años por año (intervalo 7,300–41,600).<sup>14–17</sup> En dos estudios se reportó una mayor incidencia en infantes menores de 1 año de edad (135.2 por cada 100,000 al año y 156 por cada 100,000 al año).<sup>14–16</sup> El EE ocurre en niños con epilepsia dentro de un intervalo de 9.1% a 27% conforme pasa el tiempo.<sup>18–20</sup> El EE también puede ser la primera manifestación clínica de la epilepsia. El EE sintomático es común en infantes y niños pequeños. En un estudio en 394 niños de un mes a 16 años de edad, más de 80% de los menores de

2 años tenía EE sintomático agudo, EE febril o encefalopatía progresiva, mientras que el EE criptogénico y sintomático remoto fue más común en mayores de 4 años.<sup>21</sup> Se ha reportado que el EE es recurrente en 17% de los niños.<sup>22</sup>

Se han desarrollado los lineamientos para el tratamiento con fármacos antiepilépticos (FAE) del EE pediátrico,<sup>23–25</sup> pero no se han desarrollado los lineamientos pediátricos específicos para su evaluación diagnóstica. Las recomendaciones del grupo de trabajo sobre el tratamiento del EE convulsivo de la Fundación Americana de Epilepsia (1993) incluyó adultos y niños.<sup>5</sup> Estas recomendaciones, así como una secuencia de tratamiento con FAE fueron de consenso más que basadas en la evidencia. En la actualidad están en proceso de revisión, incluyendo una redefinición de la duración necesaria para el diagnóstico de EE.

Estos lineamientos recomiendan una prueba de glucosa en todos los paciente en EE, señalando que la hipoglucemia rara vez es causa de EE, pero se obtiene la prueba para evitar una infusión de glucosa, los lineamientos también recomiendan que se consideraran de manera individual otros estudios diagnósticos, como el hemograma completo, bioquímica sérica (glucosa, calcio, sodio, magnesio y nitrógeno ureico en sangre), pruebas de los niveles de FAE y exámenes toxicológicos de orina y sangre. Se sugirió punción lumbar (PL) cuando hubiera fiebre en el EE, en especial en niños pequeños, a no ser de alguna contraindicación para la PL.

Este parámetro de práctica revisa la evidencia disponible en relación con el valor de las pruebas diagnósticas en niños y adolescentes en EE y provee recomendaciones basadas en la evidencia. No se

**Tabla 1** Clasificación del estado epiléptico

| Tipo                                                  | Definición                                                                                                                                      | Ejemplos                                                                                                          |
|-------------------------------------------------------|-------------------------------------------------------------------------------------------------------------------------------------------------|-------------------------------------------------------------------------------------------------------------------|
| <b>Sintomática aguda* (26%)</b>                       | EE que ocurre durante una enfermedad aguda (daño agudo al SNC) [encefalopatía aguda]                                                            | Meningitis, encefalitis, trastornos electrolíticos, sepsis, hipoxia, traumatismos, intoxicación                   |
| <b>Sintomática remota (33%)</b>                       | EE que ocurre sin provocación específica en un paciente con historia previa de daño al SNC (encefalopatía crónica)                              | Malformaciones del SNC, daño o lesiones traumáticas cerebrales previas, trastorno cromosómico                     |
| <b>Sintomática remota con precipitante agudo (1%)</b> | EE que ocurre con encefalopatía crónica, pero con provocación grave                                                                             | Malformaciones del SNC o daño previo del SNC con infección concurrente, hipoglucemia, hipocalcemia o intoxicación |
| <b>Encefalopatía progresiva (3%)</b>                  | EE que ocurre con un desorden subyacente progresivo del SNC                                                                                     | Trastornos mitocondriales, enfermedades del almacenamiento de lípidos en el SNC, acidopatías aminoorgánicas       |
| <b>Febril (22%)</b>                                   | EE que ocurre cuando la única provocación es una enfermedad febril, después de excluir infección directa del SNC, como meningitis o encefalitis | Infecciones respiratorias superiores, sinusitis, sepsis                                                           |
| <b>Criptogénica† (15%)</b>                            | EE que ocurre en ausencia de daño precipitante agudo a SNC, alteración metabólica sistémica, o ambos                                            | Sin causas definibles                                                                                             |

\*Los porcentajes para cada grupo se presentan con mayor detalle en el anexo 4.

†La categoría criptogénica se utiliza en lugar de idiopática, la cual que se había utilizado en la clasificación original.

incluyen lineamientos de tratamiento, porque están en desarrollo.

**Descripción del proceso.** Se efectuó una búsqueda de artículos en inglés en la biblioteca de la Universidad de Minnesota y Medline de 1970 a 2005, obteniendo 1,609 publicaciones. Los términos de búsqueda fueron: estado epiléptico, niños, resonancia magnética, tomografía computarizada del cráneo, punción lumbar, electrolitos, estudios metabólicos, errores innatos del metabolismo (EIM), electroencefalograma, hiponatremia, hipopotasemia, hipocalcemia, hipoglucemia, acidosis, alcalosis, azotemia, hipofosfatemia, hipomagnesemia, pleocitosis, toxicología e intoxicación. Se excluyeron las crisis de recién nacidos menores de un mes de edad, ya que éstas se definen como neonatales y son diferentes en causa y pronóstico. El límite máximo de edad fue 19 años. En esta revisión sólo se incluyeron artículos que reportaban más de 20 pacientes y se excluyeron los que se basaban en reportes de casos individuales o con muestras pequeñas o de hallazgos patológicos raros que predispusieran el análisis, o artículos que hacían referencia específica de EE febril o refractario, ya que tenían una población seleccionada. Se identificaron y revisaron 25 publicaciones para la preparación de este parámetro. También se revisaron documentos de posición relevante de organizaciones profesionales.

Miembros del comité revisaron los títulos y resúmenes por contenido y relevancia. Fueron seleccionados aquellos con evaluaciones diagnósticas del EE para una revisión posterior más detallada. Para la obtención de referencias adicionales pertinentes, se revisó la bibliografía de los artículos citados. Al menos dos miembros del comité revisaron, resumieron y clasificaron cada uno de los artículos seleccionados. Los datos resumidos incluyeron número de pacientes, total de episodios del EE (si se dieron), edad, naturaleza de la selección de participantes, métodos de búsqueda de casos (prospectivo, retrospectivo o de referencia), criterios de inclusión y exclusión, clasificación, etiología y resultados de las pruebas de laboratorio, EEG o neuroimagenología. Como parte de este estudio se utilizó un sistema de cuatro niveles de clasificación desarrollado por el subcomité de normas de calidad (QSS) para determinar la validez de los estudios sobre el rendimiento de las pruebas establecidas para diagnóstico y tamizado (anexo 2). Se decidió si se podían hacer recomendaciones, dependiendo de la solidez de esta evidencia, y si era el caso, el nivel de solidez de estas recomendaciones (anexo 3). Se presentó la evidencia pertinente de cada prueba diagnóstica aunada a las recomendaciones del comité basadas en la evidencia.

Las recomendaciones incluidas en este parámetro se basaron en la revisión de datos relacionados con las

siguientes pruebas en niños con EE: 1. hemocultivo y estudios de PL; 2. niveles de FAE; 3. tamizado toxicológico; 4. estudios metabólicos y genéticos; 5. EEG, y 6. neuroimagenología (tomografía computarizada [TC] y resonancia magnética [RM]).

La mayoría de la literatura disponible no especificó si las pruebas diagnósticas analizadas fueron aplicadas de manera uniforme durante cada EE; por tanto, donde había datos faltantes, se calculó un rendimiento diagnóstico mínimo dividiendo el total de pruebas diagnósticas positivas entre el total de episodios reportados en cada estudio (si la prueba diagnóstica se realizó para cada episodio, esto lleva a una subestimación del verdadero rendimiento diagnóstico de las pruebas).

En la actualidad es común obtener un hemograma completo y los perfiles de química de rutina en niños en EE. Por ello, no desarrollamos recomendaciones basadas en la evidencia para estas pruebas, aunque en el anexo 4 se incluyó un resumen sobre su rendimiento diagnóstico. Se reportaron las alteraciones electrolíticas (por ejemplo, sodio [ $\text{Na}^+$ ] u otros electrolitos, calcio [ $\text{Ca}^{++}$ ], glucosa) o desórdenes metabólicos básicos en un porcentaje de 6% (intervalo 1%–16%) de niños en EE. En la mayoría de los estudios las alteraciones se listaron como etiología. Sin embargo, es poco claro si éstas son responsables del episodio de EE y si su corrección resultó en el cese del EE.

**Análisis de la evidencia.** En 2,903 niños de 20 estudios clase III, en 26% el EE se atribuyó a una causa sintomática aguda, en 33% a una remota, en 1% a una precipitante remota aguda, en 3% a encefalopatía progresiva, en 22% a un EE febril, y en 15% fue criptogénico (ver tabla 1).

**Estudios de laboratorio.** ¿Se deben realizar hemocultivos y PL de rutina en niños en EE? Los desórdenes infecciosos o inflamatorios, como meningitis o encefalitis, pueden causar una crisis por involucro del SNC, o por involucro sistémico que afecta el cerebro (EE sintomático agudo). Las enfermedades sistémicas suelen agravar la epilepsia preexistente al bajar el umbral convulsivo. Un desorden infeccioso puede incluirse en el diagnóstico diferencial si el paciente tiene fiebre o si existe historia de fiebre o de enfermedad previa. Ante la sospecha clínica de una infección, la obtención de hemocultivos es una práctica clínica común, así como la PL cuando hay signos que sugieren infección del SNC, en especial si se presenta fiebre.

**Hemocultivos (evidencia).** En seis estudios clase III en la categoría de sepsis (357 niños), se reportaron hemocultivos positivos en  $2.5 \pm 0.9\%$  (intervalo 0.01%–3.8%; mediana 2.6%; IC95% 1.7%–3.3%).<sup>33–35,37,38,40</sup> Se trata de un rendimiento mínimo basado en la suposición de que los hemocultivos se practicaron en todos

los pacientes en EE, no importando si existe o no sospecha de sepsis. No hubo datos disponibles para determinar el intervalo de hemocultivos positivos en pacientes con sospecha de sepsis, ni tampoco hubo datos para comprobar la incidencia de hemocultivos positivos en pacientes clínicamente fuera de riesgo de infección.

*PL (evidencia).* Se reportó un caso documentado de infección del SNC en un promedio de  $12.8 \pm 6.2\%$  (intervalo 3.4%–26.1%; mediana 11.5%; IC95% 9.9%–15.6%) de los 1,859 niños en los estudios clase III, que figura en el anexo 4; no obstante, se desconocen los criterios para obtener una PL y el número exacto de punciones realizadas. Una vez más, esto representa un menor porcentaje de estudios positivos que si supiéramos el número de PL realizadas. Además, si alguno de los pacientes no sometido a PL tuviera una infección del SNC, ello también elevaría el rendimiento diagnóstico. La variabilidad del intervalo puede estar relacionada con la edad, con mayor incidencia de infecciones del SNC, en niños pequeños, o con la selección de los criterios.<sup>14,29,30,33,39</sup>

Un estudio clase III en 49 niños en EE convulsivo identificó a 24 de ellos en EE con fiebre, en este grupo se detectó meningitis bacteriana en 4 de 9 niños sometidos a PL (8% del total y 17% del grupo febril).<sup>44</sup> Ninguno de los 25 sin EE febril fue diagnosticado con meningitis. La etiología de las infecciones del SNC en estos estudios se basó en el diagnóstico del autor más que en los resultados confirmatorios de las pruebas de laboratorio e incluyó meningitis bacteriana (4.8%) y encefalitis (3.0%). En tres estudios clase III ( $n = 185$ )<sup>29,31,40</sup> se documentaron los siguientes diagnósticos con resultados de PL: meningitis (14%),<sup>29,31</sup> encefalitis (11%),<sup>29</sup> meningitis leucémica (1%),<sup>29</sup> vasculitis (5.0%)<sup>31</sup> e hidrocefalia con derivación (0.5%).<sup>29,31</sup> Se encontró pleocitosis de etiología indeterminada en 3% de estos niños, sugiriendo que el episodio de EE fue en sí la causa de la pleocitosis.<sup>31</sup>

*Conclusiones.* Los datos de seis estudios de clase III revelaron un rendimiento diagnóstico mínimo de un hemocultivo positivo en 2.5% de los niños en EE. Los datos basados en los 1,859 niños de los estudios que figuran en el anexo 4, revelaron que el intervalo y frecuencia del diagnóstico de infecciones en el SNC es de 12.8%. En ninguno de estos estudios había indicios de que las pruebas se realizaran de modo rutinario en todos los niños en EE; se indicó o asumió el hecho de que las pruebas se efectuaran de manera selectiva.

*Recomendaciones.*

1. No existen suficientes datos para apoyar o refutar si los hemocultivo y la PL deben realizarse de manera rutinaria en niños sin sospecha clínica de infección (nivel U).<sup>2</sup>

*¿ Los niveles de FAE se deben obtener de manera rutinaria en niños que los toman y desarrollan EE?* Si un niño cuya epilepsia es tratada con FAE desarrolla EE, es posible que los niveles de éstos estén bajos, ya sea por una respuesta terapéutica o por una dosificación inadecuada, incumplimiento del tratamiento o que el FAE haya sido retirado.

*Evidencia.* Se asumió que los niveles de FAE se obtuvieron en niños que se suponía eran tratados con FAE más que de todos los niños que presentaron EE. Se consideró clase II un artículo que abordó esta cuestión.<sup>45</sup> Los datos de las pruebas de los niveles de FAE están disponibles para su revisión en 528 niños en EE de 9 estudios (tabla 2). Los niveles de FAE fueron bajos en 32% a 25% de los niños ya tratados con FAE (intervalo 2.7%–63%; mediana 21%; IC95% 8.8%–51%); en 9% a 10% se retiró el tratamiento (intervalo 1%–28%; mediana 4.2; IC95% 0.5%–18.6%), y 0.2% no cumplió con el mismo (2.7% cuando se menciona específicamente como una categoría). El incumplimiento se determinó mediante la historia clínica. En un estudio se reportó que a 4 de 9 niños con niveles bajos de FAE, se les retiraron de manera aguda o discontinuaron en un periodo de una semana. Sin embargo, los niveles bajos reportados no necesariamente son la causa del EE.<sup>7,27,45</sup>

*Conclusiones.* Los datos clase II mostraron niveles bajos de FAE en 32% de los niños tratados con FAE; sin embargo, ésta no fue necesariamente la causa del EE.

*Recomendaciones.* Se pueden considerar las pruebas de los niveles de FAE cuando un niño con profilaxis de la epilepsia mediante éstos desarrolla EE (nivel B, evidencia clases II y III).

*¿Se deben ordenar pruebas toxicológicas de rutina en niños en EE?*

La ingesta de alguna toxina o el abuso de fármacos son posibles etiologías del EE, el cual requiere diagnóstico y tratamiento tempranos.

*Evidencia.* En los 1,221 niños inscritos en 11 estudios clase III,<sup>4,26,27,29–32,36,37,41,43</sup> se documentó una ingestión de tóxicos en 3.6% de ellos (intervalo 1.5%–5.3%; mediana 3.8%; IC95% 2.3%–6.8%). Las toxinas específicas fueron teofilina, lindano, carbamazepina o quimioterapia. Esto representa un intervalo mínimo, ya que se utilizó como denominador a todos los pacientes en los estudios. No hubo información sobre si las pruebas toxicológicas se basaron en una historia sugerente o en los resultados de la examinación física o del porqué los estudios de tamizado iniciales fueron negativos. Un estudio toxicológico de orina sólo identifica drogas de abuso y se requieren pruebas de los niveles séricos toxicológicos específicos para identificar toxinas específicas.

*Conclusiones.* Los datos de 11 estudios clase III en niños en EE revelaron un diagnóstico de ingestión de 3.6%. No se sabe qué proporción de la ingesta fue supuesta.

**Tabla 2** Resultados de estudios en los que se obtuvieron los niveles de FAE

| Núm. de referencia | Clase | N   | Niveles bajos de FAE | FAE retirados o D/C | Incumplimiento de FAE |
|--------------------|-------|-----|----------------------|---------------------|-----------------------|
| 45                 | II    | 51  | 9*                   | —                   | —                     |
| 4                  | III   | 193 | —                    | 4                   | —                     |
| 34                 | III   | 83  | —                    | 23                  | —                     |
| 31                 | III   | 60  | 32                   | —                   | —                     |
| 38                 | III   | 37  | 1                    | —                   | 1                     |
| 27                 | III   | 43  | 27                   | —                   | —                     |
| 39                 | III   | 37  | —                    | 3                   | —                     |
| 42                 | III   | 24  | 5                    | 1                   | —                     |
| Total <sup>‡</sup> |       | 528 | 74                   | 31                  | 1 (0.2%)              |
| Media (%)          |       |     | 32 ± 25              | 9 ± 10              |                       |
| Mediana (%)        |       |     | 21                   | 4.2                 |                       |
| Intervalo (%)      |       |     | 2.7-63               | 1-28                |                       |
| IC95% (%)          |       |     | 8.8-51               | 0.5-18.6            |                       |

\*El número en las columnas indica el número de pacientes en cada estudio que tuvo valores de laboratorio anormales en esa prueba. Todos los estudios fueron clase III. Los campos marcados con — indican que no hubo categoría de diagnóstico para ese estudio individual en ese rubro.

<sup>‡</sup>Total de anormalidades para cada una de las pruebas dado en porcentaje del total de anormalidades discontinuadas (D/C).

<sup>‡</sup>Cuatro retiradas de manera aguda en el periodo de una semana.

FAE: fármacos antiepilépticos.

Hemos estimado este rendimiento lo suficientemente alto como para considerar las pruebas con los niveles séricos de toxicología específicos, si está indicado, ya que establecer el diagnóstico es crucial para el tratamiento.

**Recomendación.** 1. Cuando no se identifique inmediatamente una etiología aparente, se deben considerar pruebas toxicológicas, ya que la frecuencia de ingestión como diagnóstico fue de 3.6% (nivel C, evidencia clase III). Se requiere una prueba de niveles séricos toxicológicos específicos más que un simple estudio toxicológico de orina para detectar una ingesta específica supuesta por la historia clínica.

**Pruebas metabólicas y genéticas.** *¿Se deben ordenar estudios rutinarios de EIM o genéticos (cromosomales o moleculares) en niños en EE?* Los EIM y los trastornos cromosomales específicos o genéticos pueden ser la causa de disfunción neuronal y epilepsia. En algunos pacientes las crisis pueden empeorar durante una enfermedad intercurrente o por estrés metabólico. Las características históricas que sugieren un trastorno metabólico son encefalopatía neonatal inexplicable; retraso inexplicable en el desarrollo, en especial cuando hay deterioro neurológico durante una enfermedad aguda, orina con olores anormales, acidosis o coma inexplicable, sobre todo con episodios recurrentes de intolerancia a ciertos alimentos, necesidad de comer con frecuencia para evitar el letargo; o episodios de deshidratación desproporcionada en relación con la pérdida de líquidos durante una

enfermedad. Las condiciones principales que se consideran EIM son los trastornos en el metabolismo de los aminoácidos, del amonio y de los ácidos orgánicos y las alteraciones que afectan las funciones mitocondriales y peroxisomales.

**Evidencia.** Se diagnosticó o estaba presente un EIM en 4.2% de los 735 niños en nueve estudios clase III (intervalo 1.2%–8.3%; mediana 4.0%; IC95% 2.9%–5.8%), basado en un denominador de todos los niños de estos estudios, aunque es probable que las pruebas se realizaran de manera selectiva. Cuando se especificó, la dependencia a la piridoxina, la enfermedad de Leigh, la lipofuscinosis cerioide neuronal y el trastorno mitocondrial se encontraron en 0.3% cada una, y la enfermedad de Alper, acidemia metilmalónica y deficiencia de carnitina en 0.2%. Los datos relacionados con trastornos cromosómicos o genéticos no están disponibles por separado.

**Conclusiones.** Los datos de 9 estudios clase III revelaron que un EIM fue diagnosticado en 4% de los niños con EE.

**Recomendaciones.**

1. Se pueden considerar los estudios de los EIM cuando la evaluación inicial no revela ninguna etiología, en particular si hay historia sugestiva previa de un trastorno metabólico. (nivel C, evidencia clase III). Los estudios específicos obtenidos dependen de la historia y del examen clínico. No existe evidencia suficiente para apoyar o refutar que dichos estudios deben realizarse de modo habitual (nivel U).
2. No hay datos suficientes para apoyar o refutar si las pruebas genéticas (estudios cromosómicos o moleculares) deben realizarse de modo habitual en niños en EE (nivel U).

**Electroencefalografía.** *¿Se debe realizar un EEG de rutina en la evaluación de un niño en EE?* El EE se clasifica como convulsivo generalizado o focal, o no convulsivo (EENC) y las manifestaciones clínicas se asocian con el EE encefalográfico. Un EEG es necesario para demostrar la focalidad y el por qué de la distinción entre la epilepsia focal *vs.* generalizada es importante para la elección de la terapia crónica con FAE. El EE convulsivo ocurre con otros signos clínicos visibles como movimientos tónicos, tónico clónicos o clónicos. El EENC ocurre ya sea cuando el EE electroencefalográfico se asocia con alteración de la conciencia sin signos clínicos visibles, o con signos motores sutiles, como parpadeo mínimo. Un EEG realizado al mismo tiempo que el EE (EEG ictal) puede determinar si la descarga encefalográfica es focal o generalizada, demostrar EENC, o puede distinguir un evento epiléptico de uno no epiléptico (pseudocrisis).<sup>47,48</sup> El EEG se recomendó como rutinario en el parámetro de

práctica para la evaluación de la primera crisis no febril en niños; el EE fue excluido de la evidencia examinada.<sup>46</sup>

**Evidencia.** Seis estudios clase III<sup>29,31,34,40,49,50</sup> reportaron los resultados de 413 EEG en 358 niños que se presentaron en EE y fueron sometidos a EEG. Los EEG se obtuvieron en horas o días después del episodio agudo y  $89.3 \pm 13.6\%$  fueron anormales (intervalo 66%–100%; mediana 92.9%; IC95% 78.3%–100%). Los resultados se describen como características epileptiformes generalizadas en 8%, epileptiforme en 16%, características epileptiformes combinadas generalizadas y focales en 19%, enlentecimiento generalizado en 41%, enlentecimiento focal 6.3%, inactividad electrocerebral en 1.9% y normal en 7.7%. Un EEG epileptiforme se observó en 43.1% de los 358 niños (tabla 3). Un estudio clase III ( $n = 407$ ), que se centró en el pronóstico de niños con una primera crisis convulsiva no provocada también tuvo datos de EEG de 46 niños en EE.<sup>49,50</sup> Se encontró un EEG anormal en 62% de los niños con EE, comparado con 41% de niños cuyas crisis fueron <30 minutos de duración. El EENC en adultos está presente en 14% de los pacientes en los que el EE convulsivo es controlado pero la conciencia permanece dañada.<sup>51</sup>

No están disponibles los datos en relación con la prevalencia del EENC después del control del EE convulsivo en niños o en niños con condiciones neurológicas (por ejemplo, coma). Un solo estudio reportó incidencia de 8% en una población mixta de niños y adultos con coma sin explicación, los datos de los niños no se reportaron por separado.<sup>52</sup>

El estado pseudoepiléptico: se define como un evento no epiléptico que imita un EE, puede ocurrir en niños.<sup>53–55</sup> En la única serie de EE en niños que reportó estado pseudoepiléptico, 6 de cada 29 (21%) de los niños admitidos por EE convulsivo tenían pseudocrisis (clase III).<sup>53</sup>

**Conclusiones.** Los datos de 6 estudios clase III revelaron actividad epileptiforme generalizada o focal en 43.1% de los EEG realizados para EE. Las anomalías en el EEG ocurrieron en 62% de los niños con EE, comparado con 41% de los niños con una primera crisis no provocada < 30 minutos de duración. No existen datos suficientes sobre la prevalencia del EENC en niños en EE. Un pequeño estudio clase III reportó que 21% de los niños que inicialmente se pensaba en EE tenían un pseudoestado.

**Recomendaciones.**

1. Se puede considerar un EEG en un niño presentando nuevo comienzo de EE, ya que se puede determinar si hay alteraciones focales o generalizadas que influyan la decisión del diagnóstico y el tratamiento (nivel C, evidencia clase III).
2. Aunque el EENC ocurre en niños en EE, no hay datos suficientes que apoyen o refuten las recomendaciones relacionadas para saber si se debe obtener un EEG para establecer este diagnóstico (nivel U)<sup>3</sup>. Un EEG puede considerarse en un niño en EE si se sospecha de un diagnóstico de pseudoestado epiléptico (nivel C, evidencia clase III).

**Neuroimagenología.** ¿Se deben realizar TC o RM en niños con EE? Los estudios de neuroimagenología se recomiendan con base en circunstancias clínicas específicas por el parámetro de práctica para la evaluación de la primera crisis no febril en niños.<sup>46</sup> Se recomienda neuroimagenología urgente ante un déficit focal que no se resuelva rápidamente o si no se vuelve al estado mental basal después de varias horas; además, será considerada una RM no urgente en cualquier niño con crisis parcial de inicio (focales) con o sin generalización secundaria.

Un parámetro de práctica previamente publicado sobre neuroimagenología en pacientes que se presentan en la sala de urgencias con crisis (1996), no hizo recomendaciones en relación con la neuroimagenología en EE, pero sugirió neuroimagenología urgente cuando se sospeche lesión estructural seria, en especial cuando no había nueva aparición de déficits focales, alteración de la conciencia persistente, fiebre, traumatismo reciente, historia de cáncer, historia de anticoagulación o de sida.<sup>56</sup> No se han publicado parámetros relacionados con neuroimagenología en casos de EE ni en adultos ni en niños.

Se debe tomar neuroimagenología después de que el niño ha sido estabilizado y el EE controlado. Las opciones incluyen TC o RM. Esta última es más sensible y específica que la TC, pero la TC está fácilmente disponible en caso de urgencia. La TC y la RM detectan cambios focales transitorios<sup>57</sup> o secundarios a una crisis focal (lo que sugiere origen focal), siendo la RM más sensible. Cambios en las imágenes de difusión

**Tabla 3** Resultados de los EEG en 358 niños en estado epiléptico

| Resultados de EEG                                       | Núm. de pacientes (%) | Intervalo (%) |
|---------------------------------------------------------|-----------------------|---------------|
| Normal                                                  | 32 (7.7)              | 0-34          |
| Desaceleración generalizada                             | 169 (41.0)            | 26-93         |
| Desaceleración focal                                    | 26 (6.3)              | 0-23          |
| Características epileptiformes, sólo generalizadas      | 33 (8.0)              | 0-19          |
| Características epileptiformes, sólo focales            | 66 (16.0)             | 0-47          |
| Características epileptiformes, generalizadas y focales | 79 (19.1)             | 0-42          |
| Inactividad electrocerebral                             | 8 (1.9)               | 0-3.9         |
| Total*                                                  | 413                   |               |

\*Se refiere a 413 anomalías en EEG reportadas en 358 pacientes de seis estudios clase III (referencias 29, 31, 34, 40, 49, 50).

ponderada y en el coeficiente de difusión aparente después de EE en niños sugieren edema citotóxico y vasogénico.<sup>58-61</sup> Se han documentado cambios progresivos, como atrofia/esclerosis del hipocampo o atrofia global.<sup>62</sup> La mayoría de los estudios del EE infantil no reportan específicamente resultados de neuroimagenología o se realizaron antes de la llegada de la neuroimagenología moderna, pero el diagnóstico realizado en estos estudios apoya su posible utilidad.

**Evidencia.** Se encontraron lesiones estructurales en 7.8% de los 1,951 niños en EE (323 antes de la llegada de la neuroimagenología) involucrados en 20 estudios clase III (tabla E-1, en el sitio web de *Neurology* en [www.neurology.org](http://www.neurology.org)). Las anomalías específicas incluyeron malformación de SNC (1.7%), traumatismo (1.6%), embolia/hemorragia (0.9%), trastorno neurocutáneo (0.9%), tumor (0.8%), infarto vascular (0.6%), hemorragia (0.4%), absceso/cerebritis (0.4%) y malformación arteriovenosa, hidrocefalia u otros (2.0% cada uno). Estas lesiones son potencialmente diagnosticables por neuroimagenología.

Cinco estudios clase III ( $n = 174$ ) reportaron datos de TC.<sup>29,31,40,49,50</sup> De las TC tomadas en niños en EE, una media de 49% fue anormal (intervalo 29%–70%; mediana 53.4%; IC95% 32.2%–66.7%). Las alteraciones incluyeron edema cerebral (14.4%), atrofia (12.1%), infección (4.6%) [meningitis, absceso, cerebritis, granuloma], displasia del SNC en (3.5%) [esclerosis tuberosa y síndrome de Sturge Weber, uno cada uno], infarto (2.9%), tumor y hematoma (2.3% cada uno), trauma y MAV (1.2% cada uno) y calcificaciones (0.6%); un déficit antiguo/sin cambios se especificó en 4.6%.<sup>31</sup> La TC fue anormal en 29% ( $n = 11$ ) de los 38 casos de nuevo inicio, con displasia en 4, infarto e infección con dos cada una y calcificación en 1.<sup>49,50</sup> No se reportó el momento cuando se tomó la TC después de la aparición del EE. Esto podría afectar la interpretación de la presencia de atrofia, la cual podría ser secundaria respecto del episodio de EE y no una alteración preexistente. La subrepresentación de la displasia cortical como etiología probablemente se debe a la menor sensibilidad de la TC en la detección de dichas malformaciones.

En un pequeño estudio clase III se tomaron RM en 9 de 24 niños en EE.<sup>42</sup> Los resultados reportaron dos como normales y siete anormales (78%).<sup>42</sup> Los dos tuvieron atrofia, hidrocefalia o cerebritis y uno presentó infarto.

**Conclusiones.** Se asumió que la neuroimagenología se realizó por indicaciones clínicas o en ausencia de etiología conocida. El total de las lesiones importantes para el diagnóstico y tratamiento fue relativamente alto. En datos de 20 estudios clase III, se encontraron lesiones probablemente detectables con neuroimagenología en 7.8% de los niños,

basado en un denominador de todos los sujetos disponibles en los estudios; por tanto, estos datos representan un estimado del rendimiento mínimo de los estudios. La neuroimagenología identifica causas estructurales para el EE, en particular para excluir la necesidad de la intervención neuroquirúrgica en niños con la reaparición del EE sin historia previa de epilepsia, o en aquellos con EE persistente a pesar del tratamiento adecuado.

#### *Recomendaciones.*

1. La neuroimagenología puede considerarse en la evaluación de un niño en EE si hay indicaciones clínicas o si la etiología es desconocida (nivel C, evidencia clase III). Una neuroimagenología sólo debe de hacerse después de que el niño ha sido estabilizado de manera apropiada y la actividad de la crisis controlada.
2. No hay suficiente evidencia para apoyar o refutar la recomendación de neuroimagenología de rutina (nivel U).

#### **Investigación a futuro.**

1. Se necesitan estudios prospectivos para definir los factores, o combinación de ellos que puedan precipitar el EE en niños.
2. Se deben llevar a cabo estudios prospectivos controlados para definir el papel de las investigaciones de laboratorio selectivas o de rutina en la evaluación de niños en EE. Esto debe incluir estudios de EIM y pruebas de niveles séricos toxicológicos específicos, como una causa de EE en niños con las pruebas diagnósticas disponibles.
3. Se deben realizar estudios prospectivos ciegos controlados para definir el marco y el momento de realizar un EEG en la evaluación de niños con EE, así como para determinar si los resultados de un EEG postictal y un EEG ictal inesperado tienen importancia para el pronóstico y tratamiento.
4. Estudios prospectivos controlados con evaluaciones ciegas deben evaluar el rendimiento de la neuroimagenología ya sea de rutina o selectiva, en niños en EE.
5. Se requieren estudios prospectivos para determinar la frecuencia de EENC después del control del EE convulsivo en niños, su etiología y su importancia en el pronóstico.

**Declaración de la misión.** El QSS de la AAN busca desarrollar parámetros de práctica científica y clínicamente relevantes para la práctica de la neurología. Los parámetros de práctica son estrategias para el manejo de pacientes, los cuales ayudan a los médicos en la toma de decisiones. Un parámetro de práctica es una o más recomendaciones basadas en el análisis de evidencia sobre un problema clínico en específico.

Éstos pueden incluir diagnósticos, síntomas, tratamiento o evaluación de los procedimientos.

## RENUNCIA DE RESPONSABILIDAD

Esta declaración fue provista como un servicio educativo de la AAN. Se basa en la evaluación de información científica y clínica actual. No tiene como intención incluir todos los posibles métodos adecuados para el cuidado de un problema neurológico particular o todos los criterios legítimos para escoger el uso de un procedimiento específico. Tampoco es la intención excluir ninguna metodología alternativa razonable. La AAN reconoce que las decisiones de atención son la prerrogativa del paciente y del médico al cuidado del mismo, con base en las circunstancias involucradas.

## DECLARACIÓN DE CONFLICTOS DE INTERESES

La AAN está comprometida en producir guías de práctica clínica (GPC), independientes, críticas y veraces. Importantes esfuerzos se hacen para minimizar la posibilidad de conflictos de intereses para influir en las recomendaciones de esta GPC. En la medida de lo posible, la AAN mantiene separados a aquellos que tienen un interés financiero en el éxito o fracaso de productos evaluados en esta GPC de aquellos que desarrollan los lineamientos. Se obtuvieron formularios de conflicto de intereses de cada uno de los autores y se revisaron por un comité de supervisión antes de iniciar el proyecto. La AAN limita la participación de autores con conflictos de interés sustanciales. La AAN prohíbe la participación comercial en, o el financiamiento de, proyectos sobre lineamientos. Las versiones preliminares de los lineamientos han sido evaluadas por tres comités de la AAN, una red de neurólogos, revisores expertos de *Neurology* y representantes de los campos relacionados. La guía de la AAN sobre la política de conflictos de intereses de autor puede ser vista en [www.aan.com](http://www.aan.com).

## ANEXO 1

*Miembros del QSS.* Jacqueline French, MD, FAAN (copresidente); Gary S. Gronseth, MD (copresidente); Charles E. Argoff, MD; Stephen Ashwal, MD, FAAN (de oficio) (facilitador); Christopher Bever, Jr., MD, MBA, FAAN; John D. England, MD, FAAN; Gary M. Franklin, MD, MPH (ex-officio); Gary H. Friday, MD, MPH, FAAN; Larry B. Goldstein, MD, FAAN; Deborah Hirtz, MD (ex-officio); Robert G. Holloway, MD, MPH, FAAN; Donald J. Iverson, MD, FAAN; Leslie A. Morrison, MD; Clifford J. Schostal, MD; David J. Thurman, MD, MPH; William J. Weiner, MD, FAAN; Samuel Wiebe, MD.

*Miembros del comité de práctica de CNS.* Carmela Tardo, MD (presidente); Bruce Cohen, MD (vicepresidente); Diane K. Donley, MD; Bhuwan P. Garg, MD; Brian Grabert, MD; Michael Goldstein, MD; David Griesemer, MD; Edward Kovnar, MD; Augustin Legido, MD; Leslie Anne Morrison, MD; Ben Renfroe, MD; Shlomo Shinnar, MD; Gerald Silverboard, MD; Russell Snyder, MD; Dean Timmons, MD; William Turk, MD; Greg Yim, MD.

## ANEXO 2

*Esquema de clasificación de la evidencia para determinar el rendimiento de los diagnósticos y pruebas de tamizado existentes de la AAN.*

*Clase I.* Una muestra estadística<sup>1</sup> basada en poblaciones<sup>2</sup> de pacientes estudiados en un punto en el tiempo (por lo regular precoz) durante el transcurso de la enfermedad. Todos los pacientes se someten a la intervención de interés. Si el resultado no es objetivo,<sup>3</sup> se determina en una evaluación que está enmascarada a las presentaciones clínicas de los pacientes.

*Clase II.* Una muestra estadística basada en pacientes no remitidos a la clínica<sup>3</sup> estudiados en un punto uniforme en el tiempo (por lo regular precoz) durante el transcurso de la enfermedad. La mayoría (80%) de los pacientes se somete a la intervención de interés. Si el resultado no es objetivo,<sup>5</sup> se determina en una evaluación que es enmascarada a las prestaciones clínicas del paciente.

*Clase III.* Una muestra selecta basada en pacientes remitidos a clínica<sup>4</sup> estudiados durante el transcurso de la enfermedad. Algunos pacientes se someten a la intervención de interés. El resultado, si no es objetivo,<sup>5</sup> se determina en una evaluación realizada por alguien que no sea el médico tratante.

*Clase IV.* Opinión de expertos, reportes de casos o cualquier estudio que no cumpla con los criterios para la clase I y III.

Éste es un esquema de clasificación desarrollado por el QSS para estudios encaminados a determinar el rendimiento de diagnósticos establecidos y exámenes de revisión o intervenciones y es apropiado sólo cuando la precisión diagnóstica de la prueba o intervención es buena.

Además, la anomalía potencialmente identificada por las pruebas de tamizado debería ser tratable o tener importantes implicaciones en el pronóstico. Esta clasificación es diferente de otras recomendadas del QSS, las cuales se han publicado en los últimos parámetros relacionados con estudios diagnósticos, pronósticos o terapéuticos.

(1) Muestra estadística: una completa (consecutiva), aleatoria o sistemática (por ejemplo, cada tres pacientes) muestra de la población disponible con la enfermedad; (2) Basado en la población: La población disponible para el estudio consta de todos los pacientes dentro de una región geográfica definida; (3) No remisión-basada en la clínica: La población disponible para el estudio se compone de todos los pacientes que acuden a un ajuste con la condición clínica a un centro de atención primaria; (4) Remisión-basada en la clínica: La población disponible para el estudio consta de todos los pacientes referidos a un centro de atención de tercer nivel o especialidad. Estos pacientes pueden haber sido seleccionados por formas más severas o inusuales de la enfermedad y por lo tanto pueden ser menos representativos; (5) Objetivo: Una medida de resultado que es muy poco probable que sea afectado por las expectativas de un observador (por ejemplo, la determinación de la muerte, la presencia de una masa en la cabeza en el estudio de TC, B12 sérica).

## ANEXO 3

*Clasificación de las recomendaciones.*

A: Es establecida como efectiva, inefectiva o dañina para la condición dada en una población específica. (El nivel A de clasificación requiere de por lo menos dos estudios consistentes clase I.)

B: Son probablemente eficaces, ineficaces o dañinas para la condición dada en la población específica. (El nivel B de clasificación requiere de al menos un estudio clase I o dos consistentes clase II.)

C: Son posiblemente eficaces, ineficaces o dañinas para la condición dada en la población específica. (El nivel C de clasificación requiere de al menos un estudio clase II o dos consistentes clase III.)

U: Son datos inadecuados o conflictivos, de acuerdo al conocimiento actual, pruebas no comprobadas.

*Received March 28, 2006. Accepted in final form July 4, 2006.*

## REFERENCIAS

1. Gastaut H. Classification of status epilepticus. *Adv Neurol* 1983;34:15–35.
2. Meldrum BS. Metabolic factors during prolonged seizures and their relation to nerve cell death. *Adv Neurol* 1983;34:261–275.
3. Meldrum B, Brierley JB. Prolonged epileptic seizures in primates: ischemic cell change and its relation to ictal physiological events. *Arch Neurol* 1973;28:10–17.
4. Maytal J, Shinnar S, Moshe SL, Alvarez LA. Low morbidity and mortality of status epilepticus in childhood. *Pediatrics* 1989;83:323–331. [Class III].
5. Dodson WE, DeLorenzo RJ, Pedley TA, Shinnar S, Treiman DM, Wannamaker BB. The treatment of convulsive status epilepticus: Recommendations of the Epilepsy Foundation of America's Working Group on Status Epilepticus. *JAMA* 1993;270:854–859.
6. Shorvon S. Status Epilepticus: Its Clinical Features and Treatment in Children and Adults. Cambridge: Cambridge University Press; 1994.
7. Riviello JJ, Holmes GL. The treatment of status epilepticus. *Semin Pediatr Neurol* 2004;11:129–138.
8. Gastaut H. Clinical and electroencephalographic classification of epileptic seizures. *Epilepsia* 1970;11:102–113.

9. Commission on Classification and Terminology of the International League Against Epilepsy. Proposal for classification of epilepsies and epileptic syndromes. *Epilepsia* 1985;26:268–278.
10. Commission on Classification and Terminology of the International League Against Epilepsy. Proposal for revised classification of epilepsies and epileptic syndromes. *Epilepsia* 1989;30:389–399.
11. Hauser WA, Anderson VE, Loewenson RB, McRoberts SM. Seizure recurrence after a first unprovoked seizure. *N Engl J Med* 1982;307:522–528.
12. Sahin M, Menache C, Holmes GL, Riviello JJ. Outcome of severe refractory status epilepticus in children. *Epilepsia* 2001;42:1461–1467.
13. Commission on Epidemiology and Prognosis. International League Against Epilepsy. Guidelines for epidemiologic studies on epilepsy. *Epilepsia* 1993;34:592–596.
14. DeLorenzo RJ, Hauser WA, Towne AR, et al. A prospective, population-based epidemiologic study of status epilepticus in Richmond, Virginia. *Neurology* 1996;46:1029–1035.
15. Coeytaux A, Jallon P, Galobardes B, Morabia A. Incidence of status epilepticus in French speaking Switzerland: (EPISTAR). *Neurology* 2000;55:693–697.
16. Hesdorffer DC, Logroscino G, Cascino G, Annegers JF, Hauser WA. Incidence of status epilepticus in Rochester, Minnesota, 1965–1984. *Neurology* 1998;50:735–741.
17. Wu YW, Shek DW, Garcia PA, Zhao S, Johnston SC. Incidence and mortality of generalized convulsive status epilepticus in California. *Neurology* 2002;58:1070–1076.
18. Berg AT, Shinnar S, Levy SR, Testa FM. Status epilepticus in children with newly diagnosed epilepsy. *Ann Neurol* 1999;45:618–623.
19. Sillanpaa M, Shinnar S. Status epilepticus in a population-based cohort with childhood-onset epilepsy in Finland. *Ann Neurol* 2002;52:303–310.
20. Berg AT, Shinnar S, Testa FM, et al. Status epilepticus after the initial diagnosis of epilepsy in children. *Neurology* 2004;63:1027–1034.
21. Shinnar S, Pellock JM, Moshe SL, et al. In whom does status epilepticus occur: age-related differences in children. *Epilepsia* 1997;38:907–914.
22. Shinnar S, Maytal J, Krasnoff L, Moshe SL. Recurrent status epilepticus in children. *Ann Neurol* 1992;31:598–604.
23. Garr RE, Appleton RE, Robson WJ, Molyneux EM. Children presenting with convulsions (including status epilepticus) to a paediatric accident and emergency department: an audit of a treatment protocol. *Dev Med Child Neurol* 1999;41:44–47.
24. Appleton R, Choonara I, Martland T, Phillips B, Scott R, Whitehouse W. The Status Epilepticus Working Party. The treatment of convulsive status epilepticus in children. *Arch Dis Child* 2000;83:415–419.
25. Appleton R, Martland T, Phillips B. Drug management for acute tonic-clonic convulsions including convulsive status epilepticus in children. *Cochrane Database Syst Rev* 2002;CD001905.
26. Aicardi J, Chevrie JJ. Convulsive status epilepticus in infants and children: a study of 239 cases. *Epilepsia* 1970;11:187–197. [Class III].
27. Phillips SA, Shanahan RJ. Etiology and mortality of status epilepticus in children: a recent update. *Arch Neurol* 1989;46:74–76. [Class III].
28. Kang du C, Lee YM, Lee J, Kim HD, Coe C. Prognostic factors of status epilepticus in children. *Yonsei Med J* 2005;28:27–33. [Class III].
29. Lacroix J, Deal C, Gauthier M, Rousseau E, Farrell CA. Admissions to a pediatric intensive care unit for status epilepticus: a 10-year experience. *Crit Care Med* 1994;22:827–832. [Class III].
30. Tabarki B, Yacoub M, Selmi H, Oubich F, Barasaoui S, Essoussi AS. Infantile status epilepticus in Tunisia: clinical, etiological and prognostic aspects. *Seizure* 2001;10:365–369. [Class III].
31. Dunn DW. Status epilepticus in children: etiology, clinical features, and outcome. *J Child Neurol* 1988;3:167–173. [Class III].
32. Scholtes FBJ, Renier WO, Meinardi H. Status epilepticus in children. *Seizure* 1996;5:177–184. [Class III].
33. Chin RFM, Verhulst L, Neville BGR, Peters MJ, Scott RC. Inappropriate emergency management of status epilepticus in children contributes to need for intensive care. *J Neurol Neurosurg Psychiatry* 2004;75:1584–1588. [Class III].
34. Karasalioglu S, Oner N, Celtik C, Celik Y, Biner B, Utku U. Risk factors of status epilepticus in children. *Pediatr Inter* 2003;45:429–434. [Class III].
35. Eriksson KJ, Koivikko MJ. Status epilepticus in children: aetiology, treatment and outcome. *Dev Med Child Neurol* 1997;39:652–658. [Class III].
36. Mah JK, Mah MW. Pediatric status epilepticus: a perspective from Saudi Arabia. *Pediatr Neurol* 1999;20:364–369. [Class III].
37. Yager JY, Cheang M, Seshia SS. Status epilepticus in childhood. *Can J Neurol Sci* 1988;15:402–404. [Class III].
38. Garzon E, Fernandes RMF, Sakamoto AC. Analysis of clinical characteristics and risk factors for mortality in human status epilepticus. *Seizure* 2003;12:337–345. [Class III].
39. Kwong KL, Lee SL, Yung A, Wong VCN. Status epilepticus in 37 Chinese children: aetiology and outcome. *J Paediatr Child Health* 1995;31:395–398. [Class III].
40. Gulati S, Kalra V, Sridhar MR. Status epilepticus in Indian children in a tertiary care center. *Indian J Pediatr* 2005;72:105–108. [Class III].
41. Kwong KL, Chang K, Lam SY. Features predicting adverse outcomes of status epilepticus in childhood. *Hong Kong Med J* 2004;10:156–159. [Class III].
42. Ibrahim SH, Yezdan MA, Nizami SQ. Status epilepticus in children: a five-year experience at Aga Khan University Hospital. *J Pak Med Assoc* 2003;53:597–599. [Class III].
43. Maegaki Y, Kurozawa Y, Hanaki K, Ohno K. Risk factors for fatality and neurological sequelae after status epilepticus in children. *Neuropediatrics* 2005;36:186–192. [Class III].
44. Chin RF, Neville BG, Scott RC. Meningitis is a common cause of convulsive status epilepticus with fever. *Arch Dis Child* 2005;90:66–69. [Class III].
45. Maytal J, Novak G, Ascher C, Bienkowski R. Status epilepticus in children with epilepsy: the role of antiepileptic drug levels in prevention. *Pediatrics* 1996;98:1119–1121. [Class II].
46. Hirtz D, Ashwal S, Berg A, et al. Practice parameter: Evaluating a first non-febrile seizure in children. *Neurology* 2000;55:616–623.

47. Privitera MD, Strawsurg RH. Electroencephalographic monitoring in the emergency department. *Emerg Med Clin North Am* 1994;12:1089–1101.
48. Thomas P. Status epileptics: Indications for emergency EEG. *Neurophysiol Clin* 1997;27:398–405.
49. Shinnar S, Kang H, Berg AT, Goldensohn ES, Hauser WA, Moshe SL. EEG abnormalities in children with a first unprovoked seizure. *Epilepsia* 1994;35:471–476. [Class III].
50. Shinnar S, Berg AT, Moshe SL, et al. The risk of seizure recurrence following a first unprovoked afebrile seizure in childhood: an extended follow-up. *Pediatrics* 1996;98:216–225. [Class III].
51. DeLorenzo RJ, Waterhouse EJ, Towne AR, et al. Persistent nonconvulsive status epilepticus after the control of convulsive status epilepticus. *Epilepsia* 1998;39:833–840.
52. Towne AR, Waterhouse EJ, Boggs JG, et al. Prevalence of nonconvulsive status epilepticus in comatose patients. *Neurology* 2000;54:340–345.
53. Pakalnis A, Paolicchi J, Gilles E. Psychogenic status epilepticus in children: Psychiatric and other risk factors. *Neurology* 2000;54:969–970. [Class III].
54. Tuxhorn IEB, Fischbach HS. Pseudostatus epilepticus in childhood. *Pediatr Neurol* 2002;27:407–409.
55. Papavasiliou A, Vassiliki N, Paraskevolakos E, Kotsalis Ch, Bazigou H, Bardani I. Psychogenic status epilepticus in children. *Epilepsy Behav* 2004;5:539–546.
56. Greenberg MK, Barsan WG, Starkman S. Practice parameter: neuroimaging on the emergency patient presenting with seizure-summary statement. *Neurology* 1996;47:26–32.
57. Kramer RE, Luders H, Lesser RP, et al. Transient focal abnormalities of neuroimaging studies during focal status epilepticus. *Epilepsia* 1987;28:528–532.
58. Lansberg MG, O'Brien MW, Norbash AM, Moseley ME, Morrell M, Albers GW. MRI abnormalities associated with partial status epilepticus. *Neurology* 1999;52:1021–1027.
59. Kim J, Chung JI, Yoon PH, et al. Transient MR signal changes in patients with generalized tonic clonic seizure or status epilepticus: periictal diffusion-weighted imaging. *AJNR Am J Neuroradiol* 2001;22:1149–1160.
60. Senn P, Lovblad KO, Zutter D, et al. Changes on diffusion-weighted MRI with focal motor status epilepticus: case report. *Neuroradiology* 2003;45:246–249.
61. Scott RC, Gadian DG, King MD, Chong WK, Cox TC, Neville BGR. Magnetic resonance imaging findings within 5 days of status epilepticus in childhood. *Brain* 2002;125:1951–1959.
62. Perez ER, Maeder P, Villemure KM, Vischer VC, Villemure JG, Deonna T. Acquired hippocampal damage after temporal lobe seizures in 2 infants. *Ann Neurol* 2000;48:384–387.
63. Fujiwara T, Ishida S, Miyakoshi M, et al. Status epilepticus in childhood: a retrospective study of initial convulsive status and subsequent epilepsies. *Folia Psychiatr Neurol Jpn* 1979;33:337–344. [Class III].
64. Vigeveno F, DiCapua M, Fusco L, Bertini E, Maccagnani F. Status epilepticus in infancy and childhood. *J Pediatr Neurosci* 1985;1:101–112. [Class III].

## ANEXO 4.

Datos de clasificación y laboratorio de los estudios clase III en niños en estado epiléptico.\*

| Referencia                              | Pacientes (n) | Sintomática aguda | Sintomática remota | Sintomática remota con precipitante agudo | Encefalopatía progresiva | Febril    | Criptogénica | Elec/de H <sub>2</sub> O | Met       | Sepsis   | Infección del SNC |
|-----------------------------------------|---------------|-------------------|--------------------|-------------------------------------------|--------------------------|-----------|--------------|--------------------------|-----------|----------|-------------------|
| 26                                      | 239           | 63                | 40                 | -                                         | 10                       | 67        | 59           | 18                       | -         |          | 29                |
| 27                                      | 218           | 87                | 72                 | -                                         | 3                        | 50        | 6            | 25                       | -         |          | 30                |
| 28                                      | 189           | 26                | 86                 | -                                         | -                        | †         | 77           | -                        | 8         |          | 10                |
| 29                                      | 153           | 71                | 59                 | -                                         | 2                        | 21        | 0            | 5                        | -         |          | 40                |
| 30                                      | 139           | 56                | 9                  | -                                         | 10                       | 57        | -            | -                        | 14        |          | 26                |
| 31                                      | 114           | 17                | 66                 | 7                                         | -                        | 16        | 8            | 5                        | -         |          | 8                 |
| 32                                      | 112           | 25                | 69                 | 1                                         | 7                        | 5         | 5            | 1                        | -         |          | 10                |
| 4                                       | 193           | 45                | 45                 | -                                         | 11                       | 46        | 46           | -                        | 4         |          | 14                |
| 33                                      | 90            | 24                | 33                 | 6                                         | -                        | 27        | -            | 2                        | -         | 1        | 18                |
| 34                                      | 83            | 13                | 42                 | -                                         | 2                        | -         | 26           | 1                        | -         | 2        | 8                 |
| 35                                      | 65            | 13                | 10                 | -                                         | 3                        | 24        | 15           | -                        | 3         | 1        | 8                 |
| 36                                      | 59            | 8                 | 29                 | 3                                         | -                        | 18        | 1            | 2                        | -         |          | 2                 |
| 37                                      | 52            | 16                | 17                 | -                                         | 2                        | 11        | 6            | 6                        | -         | 2        | 6                 |
| 38                                      | 37            | 14                | 16                 | -                                         | -                        | 6         | 1            | -                        | 3         | 1        | 4                 |
| 39                                      | 37            | 22                | 5                  | -                                         | 4                        | 2         | 4            | -                        | 4         |          | 8                 |
| 40                                      | 30            | 12                | 14                 | -                                         | -                        | 3         | 1            | 2                        | 2         | 1        | 3                 |
| 41                                      | 25            | 11                | 8                  | -                                         | 1                        | 3         | 2            | 4                        | -         |          | 5                 |
| 42                                      | 24            | 6                 | 9                  | -                                         | -                        | 1         | 8            | -                        | 1         |          | 4                 |
| Total <sup>‡</sup>                      | 1 859         |                   |                    |                                           |                          |           |              | 71 (3.8%)                | 39 (2.1%) | 8 (0.4%) | 233 (12.8%)       |
| 43 <sup>§</sup>                         | 234           | 19                | 66                 | -                                         | 2                        | 114       | 33           | -                        | -         |          |                   |
| Clasificación de EE. Todos los estudios | 2 093 548     | 548 (26%)         | 695 (33%)          | 17 (1%)                                   | 57 (3%)                  | 471 (22%) | 305 (15%)    | -                        | -         |          |                   |

Las alteraciones electrolíticas se reportaron de la siguiente manera: Na<sup>+</sup> (n = 28, 1.5%); Ca<sup>++</sup> (n = 9, 0.5%); glucosa (n = 10, 0.5%).

\*Los números en las columnas indican el número de pacientes en cada estudio que tuvieron un valor de laboratorio anormal para esa prueba.

†La fiebre se produjo en 35% del grupo total.

‡Total de alteraciones para cada una de las pruebas dadas con los porcentajes del total de alteraciones.

§Maegaki se incluye aquí debido a que contenía datos sobre categorías EE, pero no disponen de datos de etiologías específicas.

Elec/de H<sub>2</sub>O: alteración electrolítica o deshidratación; Met: categoría metabólica, no especificada en otra; Na: sodio; Ca: calcio; Glu: glucosa.
